# Supplementary material for: Naphthalene Phthalimide Derivatives as Model Compounds for Electrochromic Materials
Source: MDPI journal article supplement (doi:10.3390/molecules28041740), 2023-02-11
Supplement: s1 [file s1]

## Supporting Information

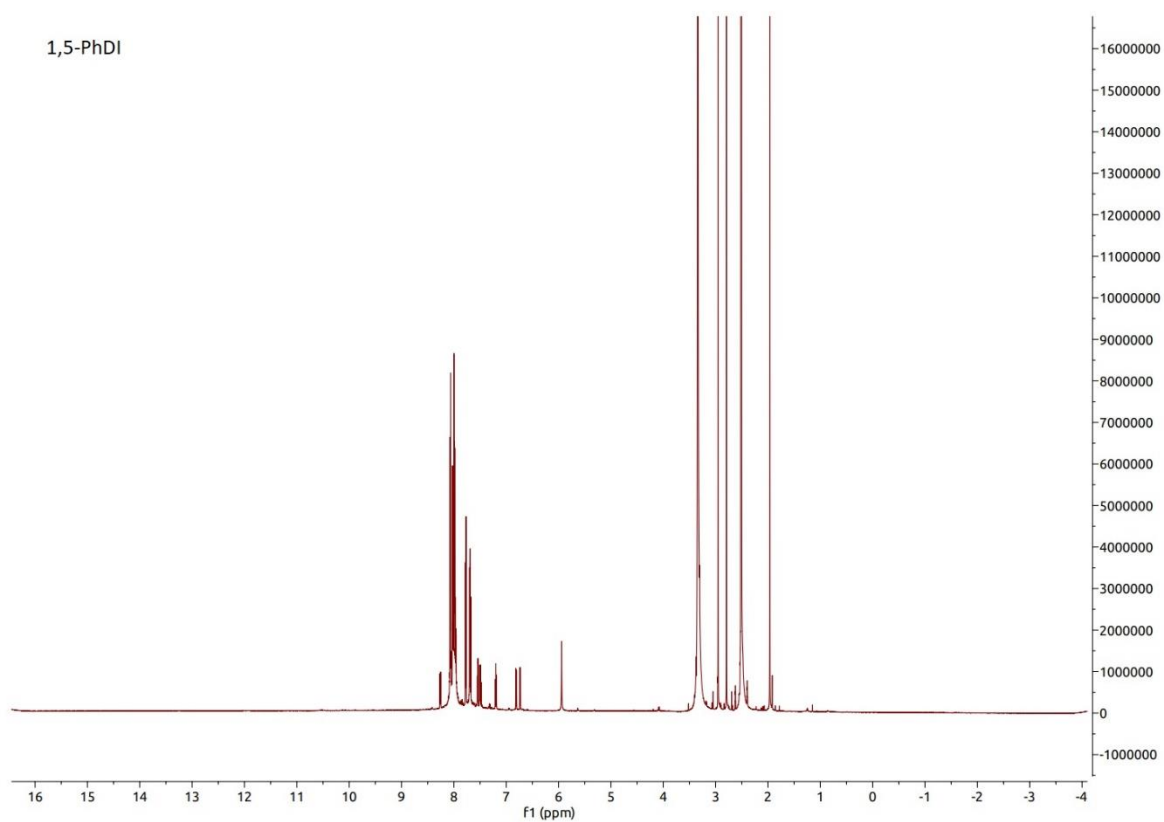

Figure S1.  $^1\text{H}$ -NMR spectrum of 1,5-PhDI.

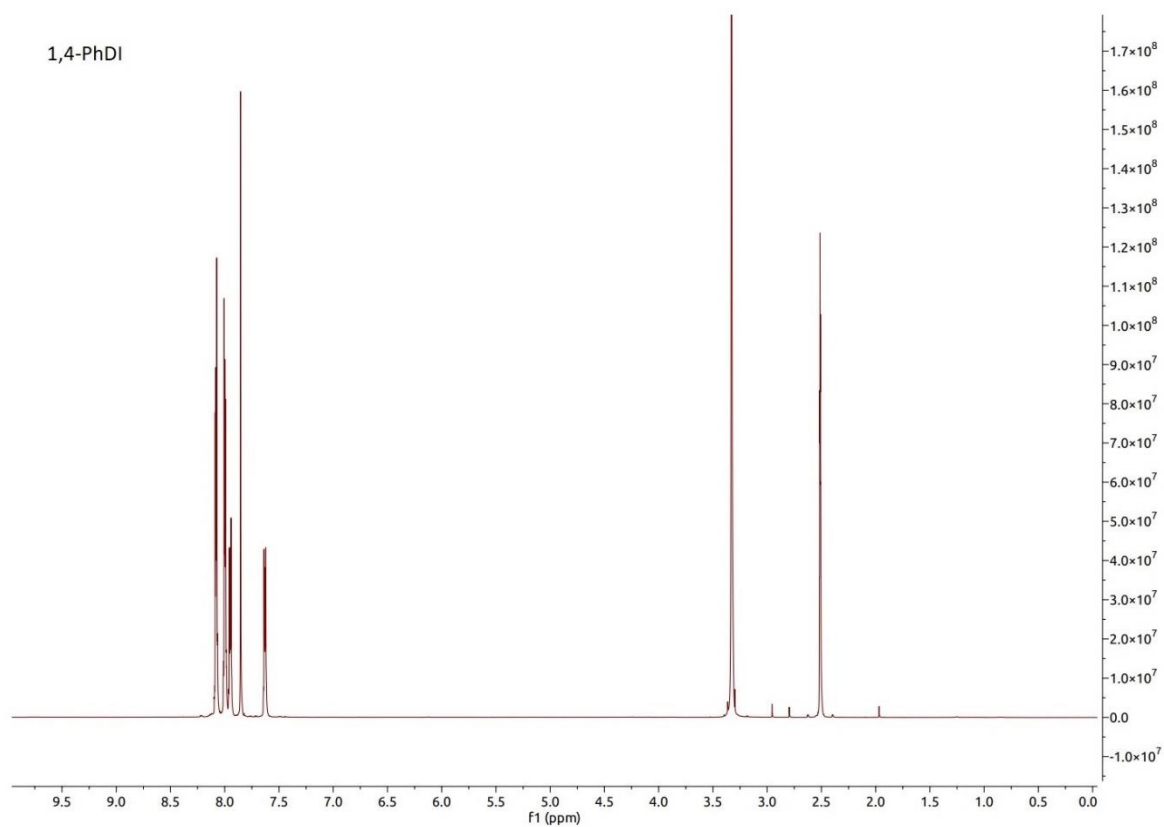

Figure S2. <sup>1</sup>H-NMR spectrum of 1,4-PhDI.

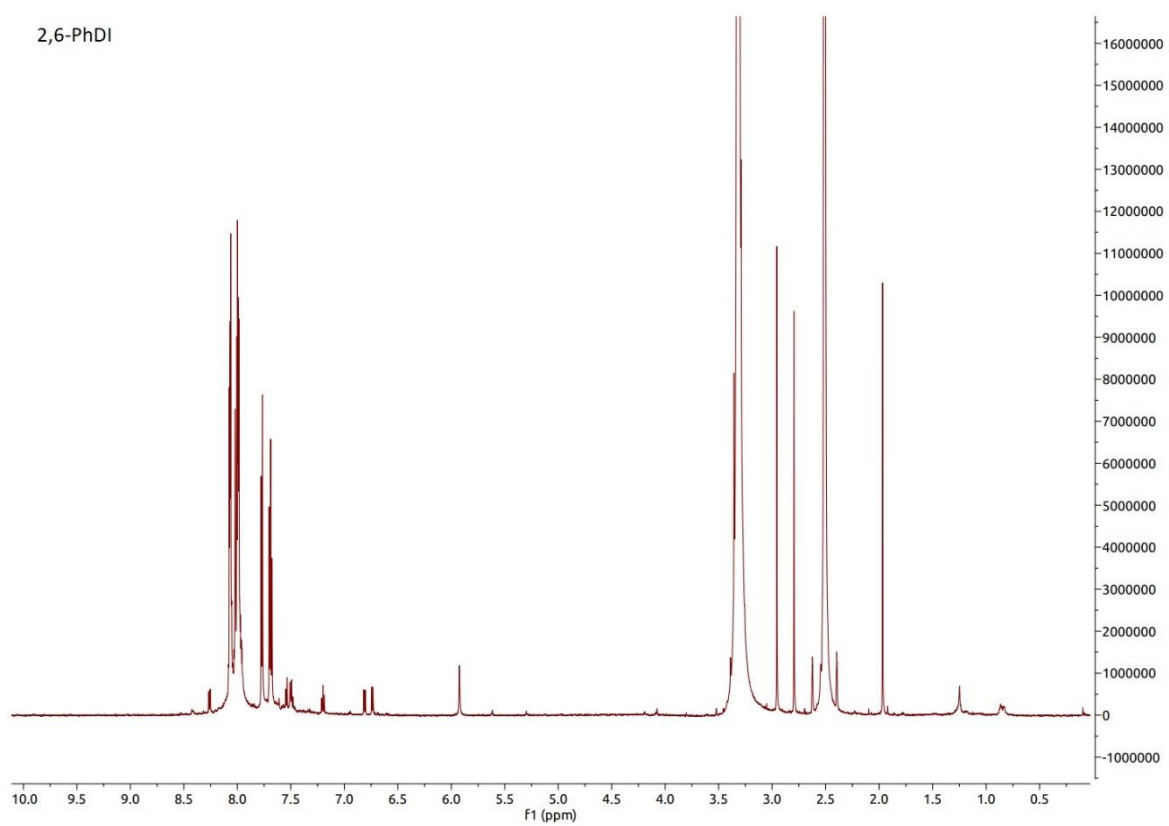

Figure S3. <sup>1</sup>H-NMR spectrum of 2,6-PhDI.

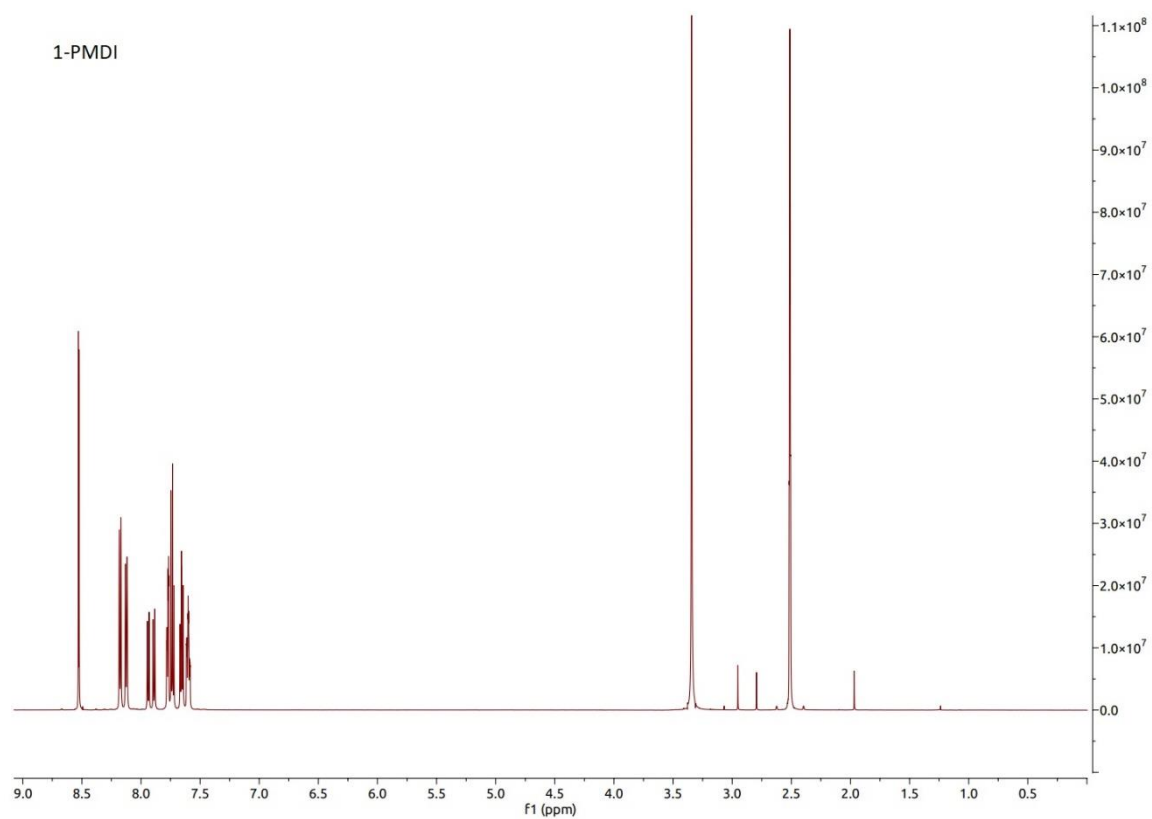

Figure S4. <sup>1</sup>H-NMR spectrum of 1-PMDI.

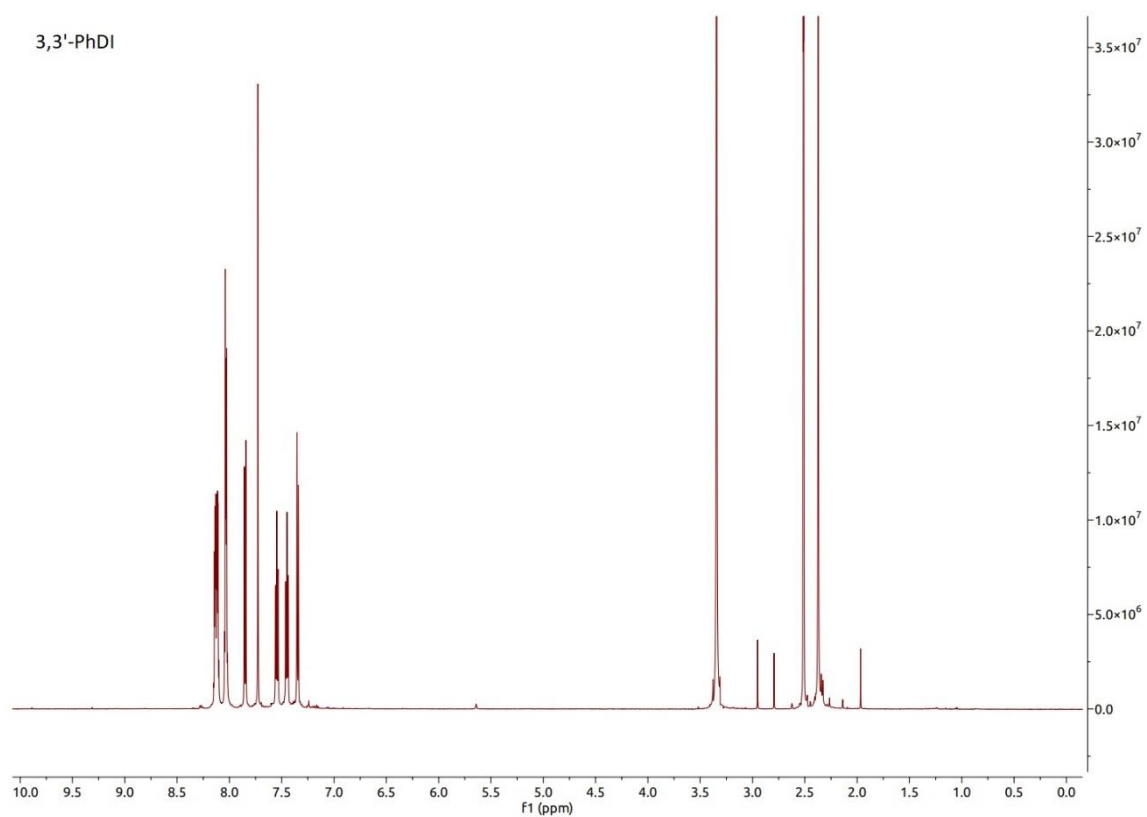

Figure S5. <sup>1</sup>H-NMR spectr of 3,3'-PhDI.

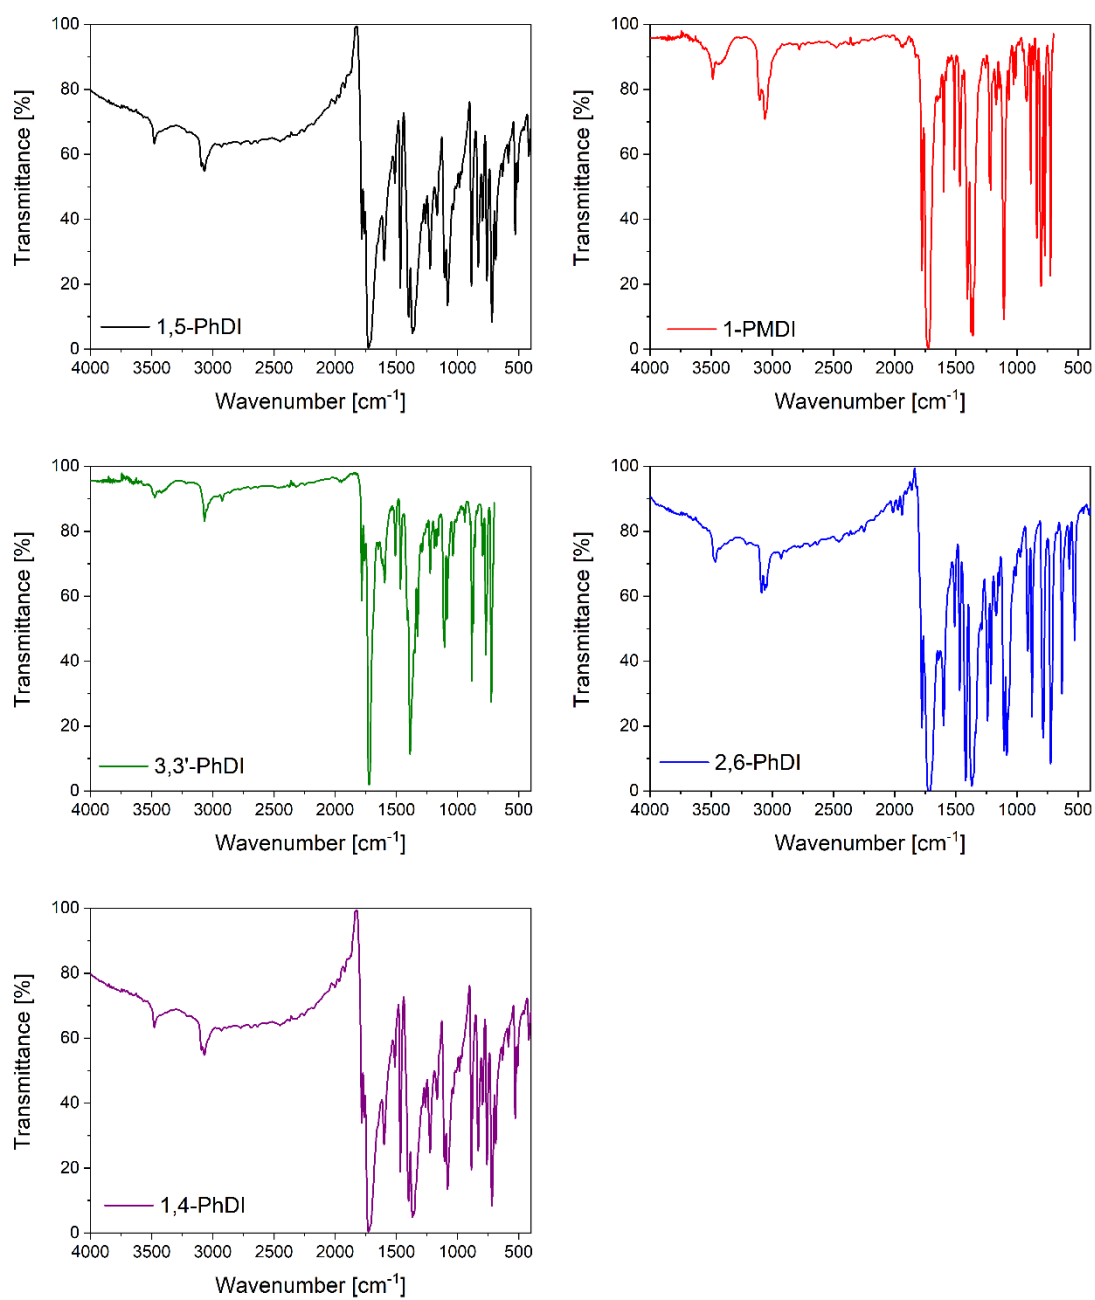

Figure S6. FTIR spectra of investigated compounds.

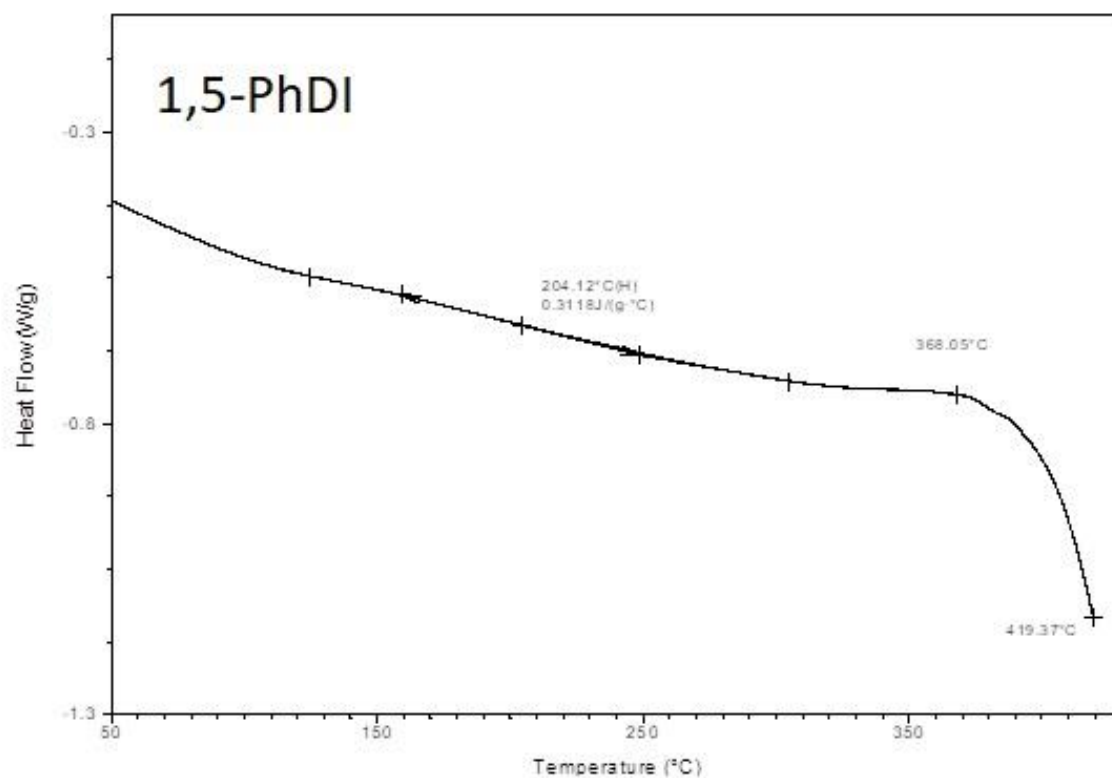

Figure S7. DSC curve registered for 1,5-PhDI during first heating stage.

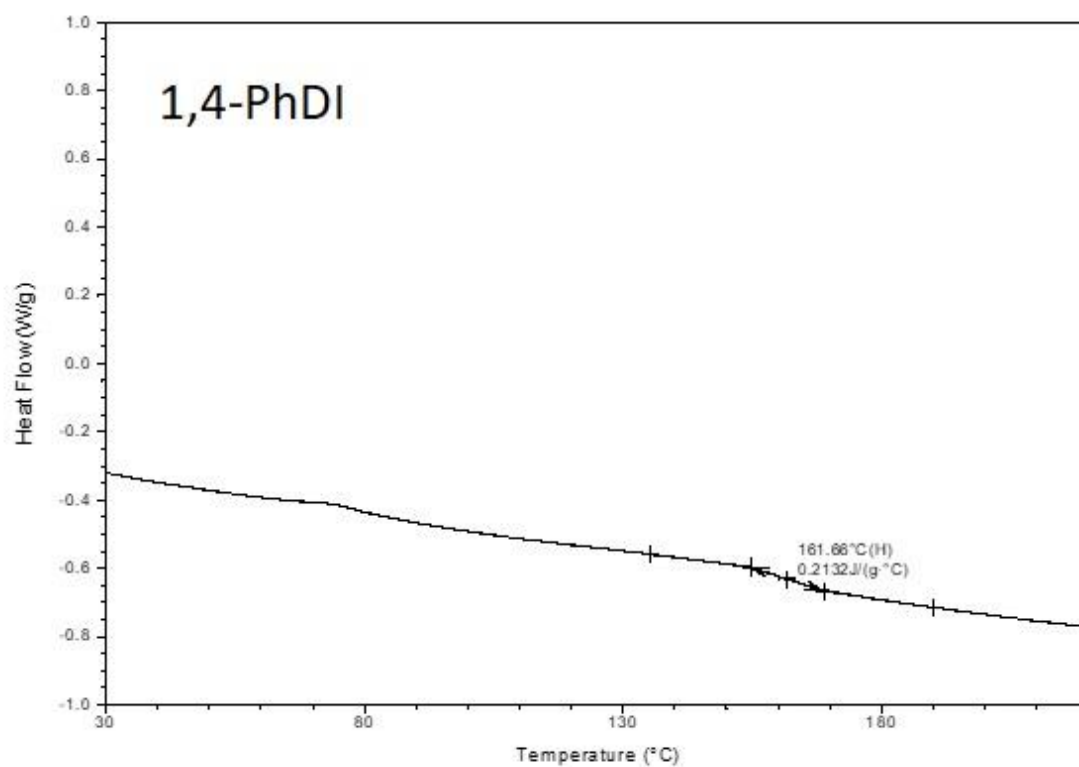

Figure S8. DSC curve registered for 1,4-PhDI during first heating stage.

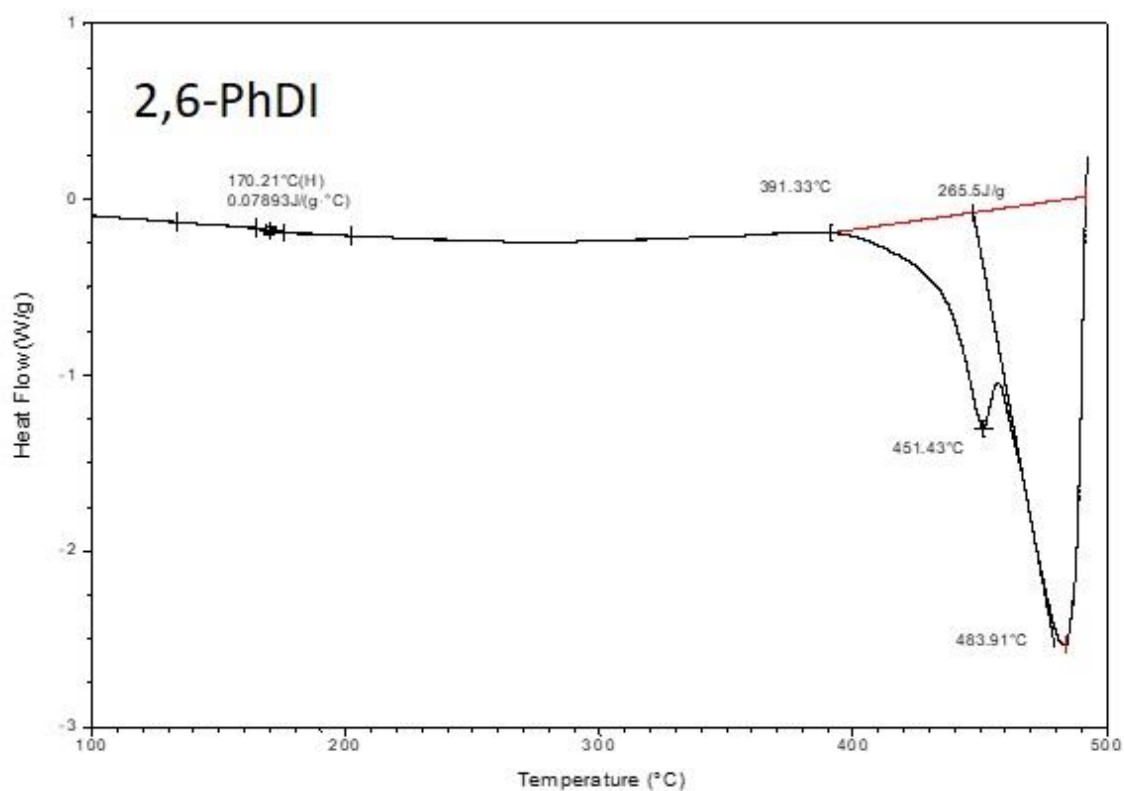

Figure S9. DSC curve registered for 2,6-PhDI during first heating stage.

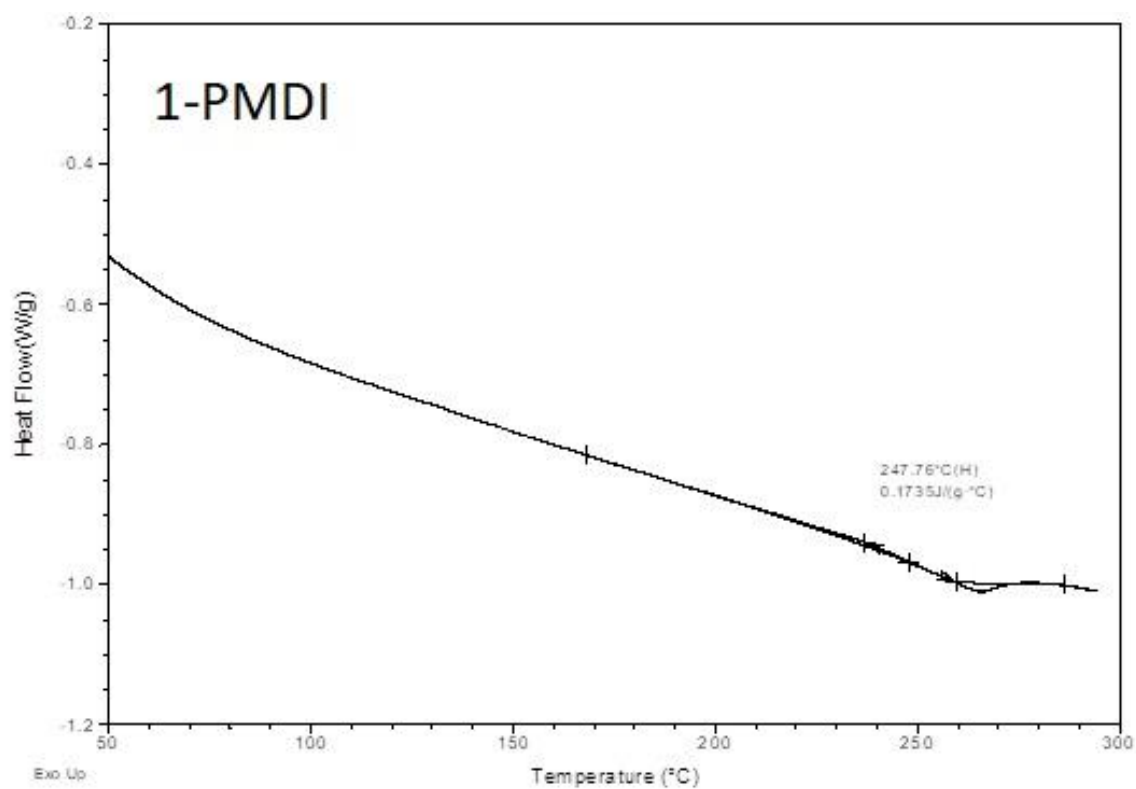

Figure S10. DSC curve registered for 1-PMDI during first heating stage.

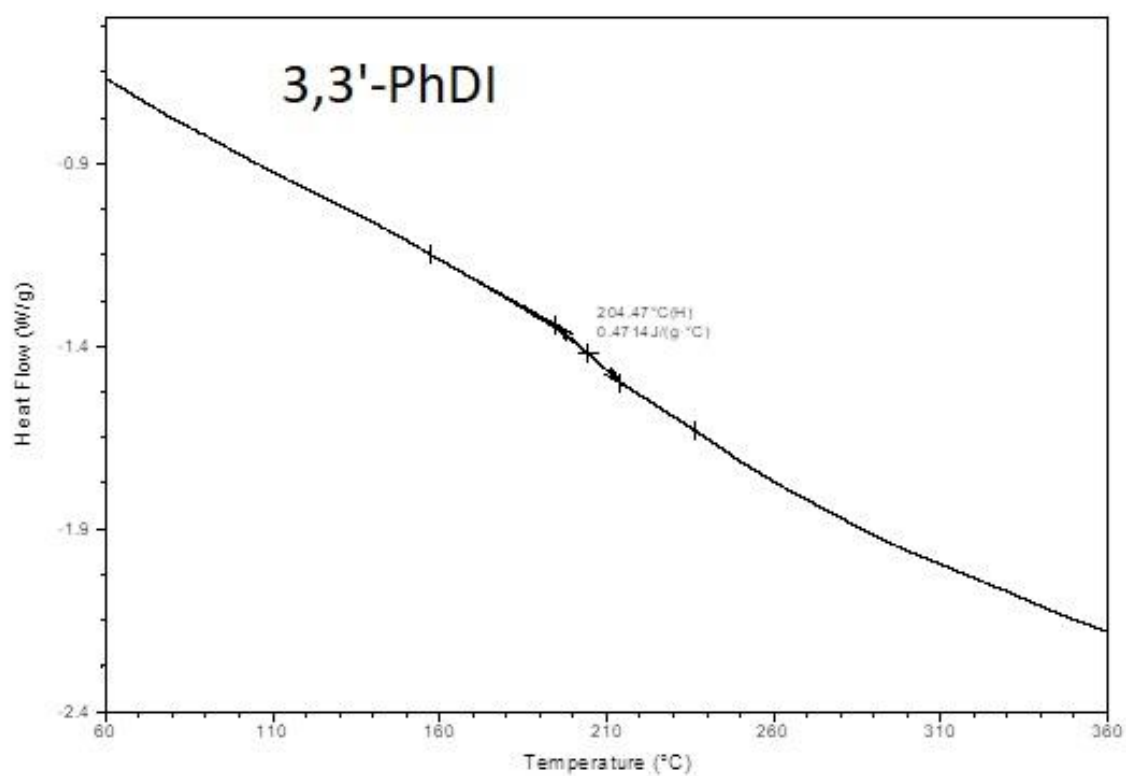

Figure S11. DSC curve registered for 3,3'-PhDI during first heating stage.

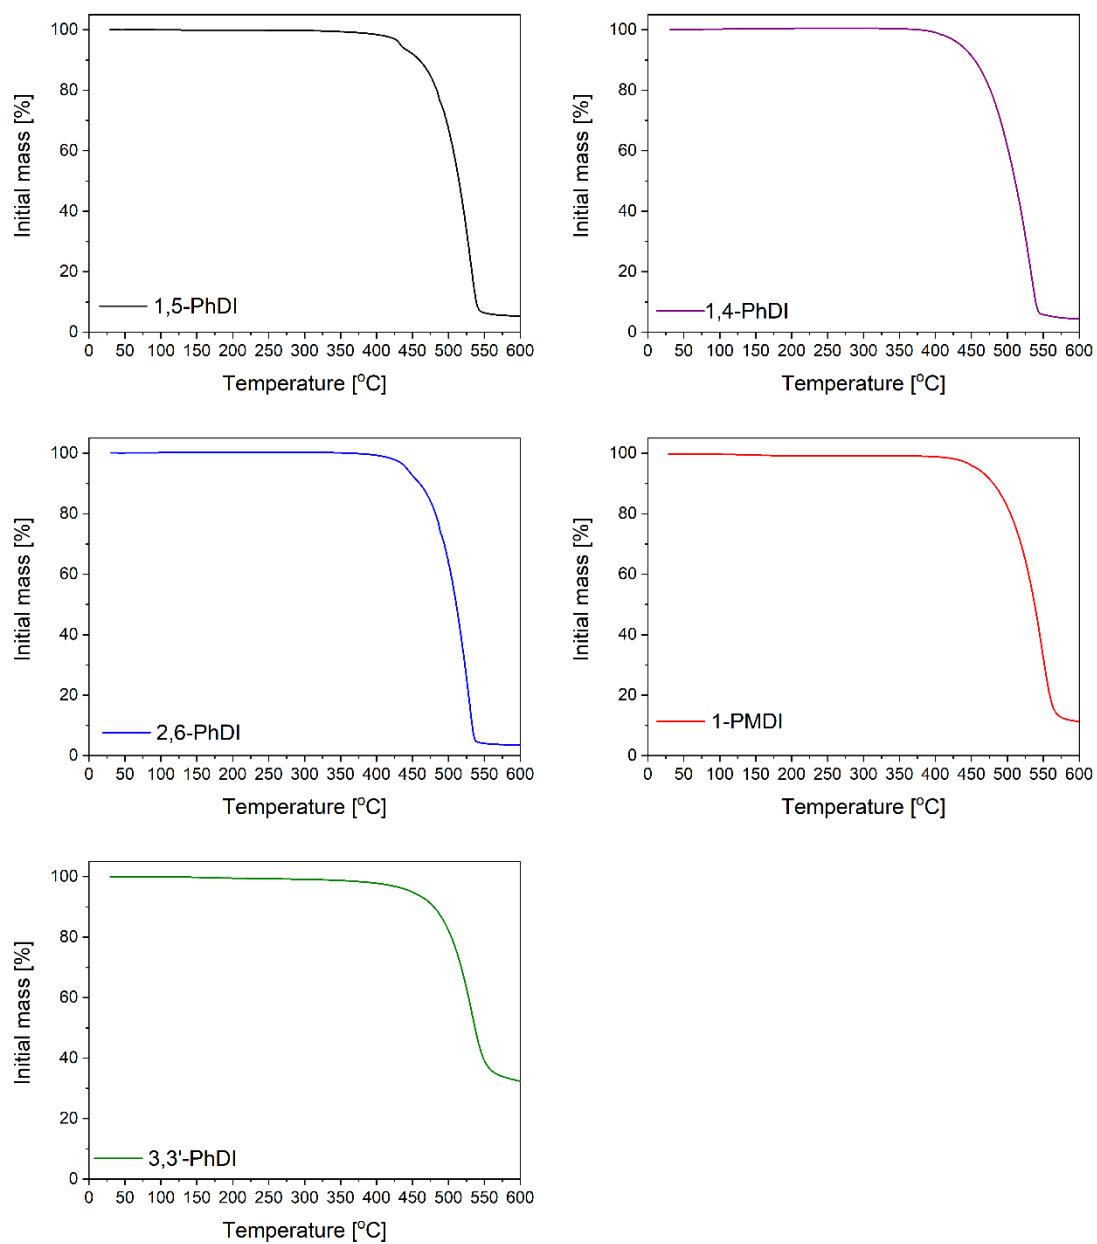

Figure S12. TGA curves registered for investigated compounds.



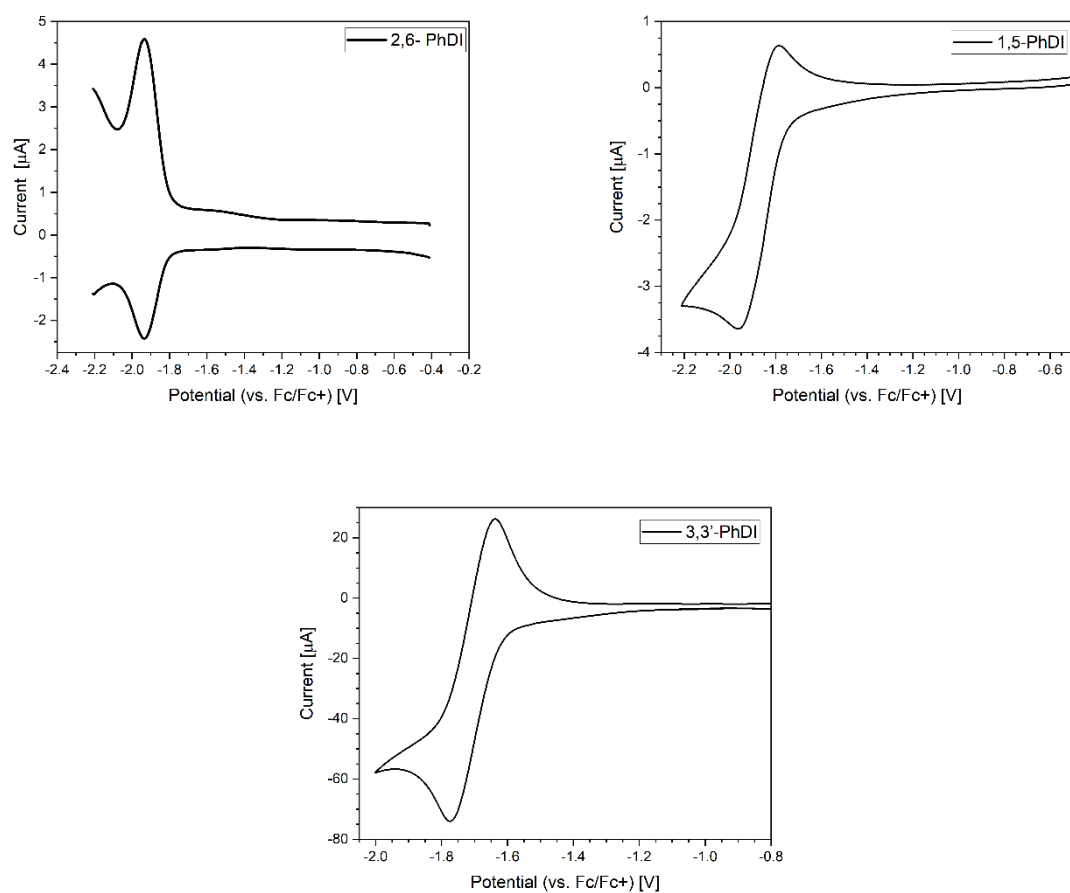

Figure S13 Differential pulse voltammogram of 2,6-PhDI and cyclic voltammograms of 1,5-PhDI and 3,3'-PhDI registered in 0.1 M Bu<sub>4</sub>NPF<sub>6</sub>/DCM electrolyte; scan rate of 0.1 V/s.

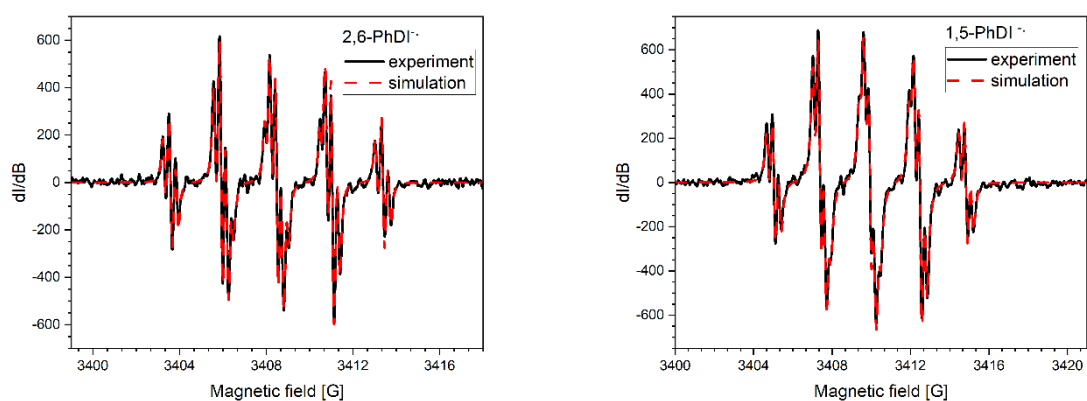

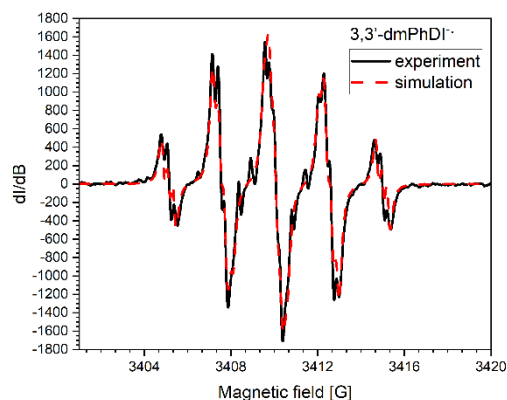

Figure S14. Experimental (black line) and simulated (red dashed line) EPR spectra of electrochemically generated radical anions of 2,6-PhDI, 1,5-PhDI and 3,3'-PhDI in 0.1 M Bu<sub>4</sub>NPF<sub>6</sub>/DCM electrolyte; fitting parameters are listed in Table 4.

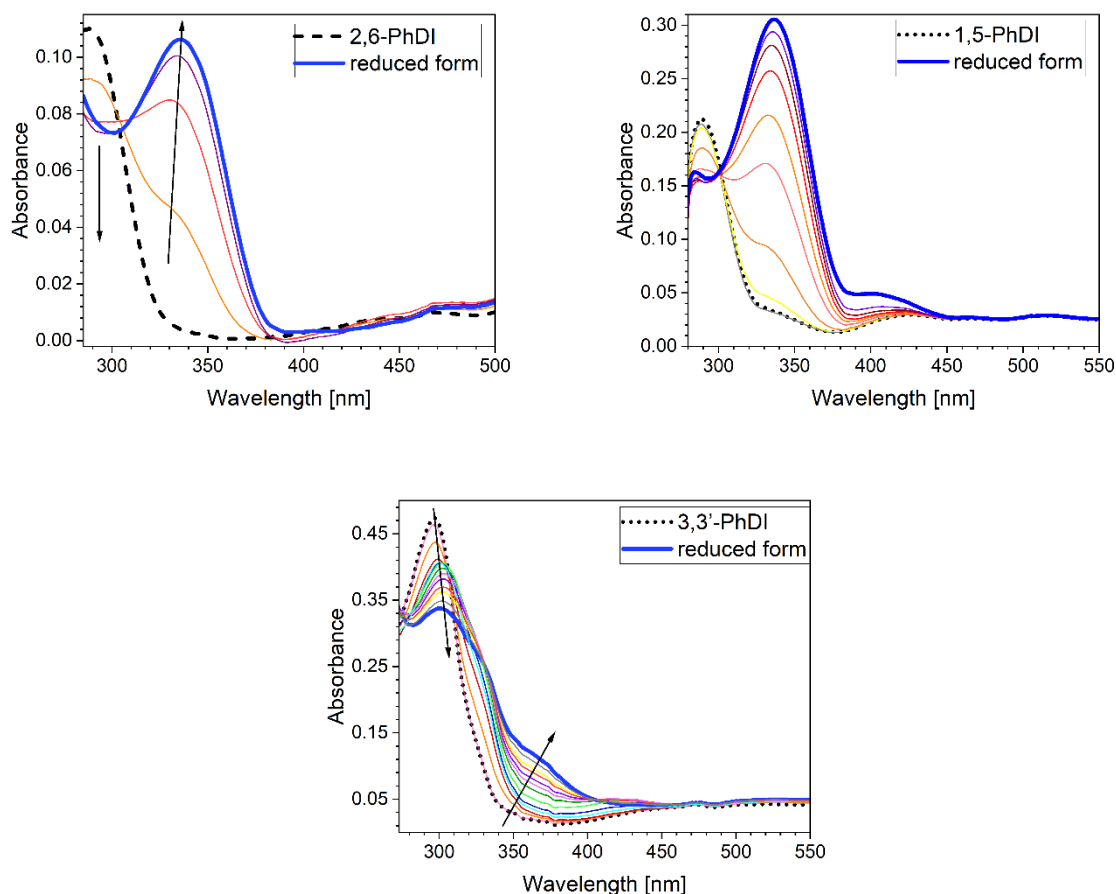

Figure S15. UV-Vis spectra of 2,6-PhDI, 1,5-PhDI and 3,3'-PhDI collected for decreasing working electrode potential in 0.1 M Bu<sub>4</sub>NPF<sub>6</sub>/DMF electrolyte.

Table S1. Calculated angles between the bridge and imide groups in neutral and reduced form.

| Compound  | neutral                                                                           | radicaldianion                                                                      |
|-----------|-----------------------------------------------------------------------------------|-------------------------------------------------------------------------------------|
| 1,5-PhDI  | 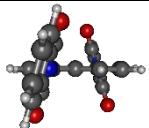 |  |
| 1,4-PhDI  |  |  |
| 2,6-PhDI  |  |  |
| 3,3'-PhDI |  |  |
